# Supplementary material for: The m6A reader protein YTHDC2 is a potential biomarker and associated with immune infiltration in head and neck squamous cell carcinoma
Source: PeerJ journal article supplement (doi:10.7717/peerj.10385), 2020-11-26
Supplement: Raw_data_3.zip [file Raw_data_3.zip]

## Sheet: 工作表1
Gene markers	None		Purity
	Cor	P	Cor	P
CD8A	0.349036	2.38e-16	0.35189	8.68e-16
CD8B	0.262128	1.19e-09	0.252738	1.31e-08
CD3D	0.235892	5.41e-08	0.227718	3.3e-07
CD3E	0.333925	4.61e-15	0.336543	1.71e-14
CD2	0.323028	5.17e-14	0.319039	4.2e-13
CD19	0.284696	3.44e-11	0.28705	8.7e-11
CD79A	0.309488	4.75e-13	0.314047	1.01e-12
CD86	0.243961	1.83e-08	0.244431	3.99e-08
CD115(CSF1R)	0.298774	3.18e-12	0.300729	9.64e-12
CCL2	0.270701	3.8e-10	0.254406	1.05e-08
CD68	0.090138	0.0395549	0.0855532	0.0579186
IL10	0.265495	7.17e-10	0.266484	1.92e-09
INOS(NOS2)	0.337146	2.43e-15	0.331447	4.44e-14
IRF5	0.258389	2.39e-09	0.263037	3.14e-09
COX(PTGS2)	0.129641	0.00300342	0.128955	0.00416927
CD163	0.275707	1.75e-10	0.284194	1.36e-10
VSIG4	0.195949	6.76e-06	0.195713	1.23e-05
MS4A4A	0.214827	7.25e-07	0.213304	1.8e-06
CD66b(CEACAM8)	0.0460849	0.293282	0.0447865	0.321499
CD11b(ITGAM)	0.318753	8.61e-14	0.317387	5.62e-13
CCR7	0.320199	6.56e-14	0.31409	1e-12
KIR2DL1	0.145362	0.000865758	0.161304	0.000327705
KIR2DL3	0.247017	1.07149e-08	0.243047	4.77736e-08
KIR2DL4	0.274521	1.77e-10	0.298106	1.48e-11
KIR3DL1	0.275158	1.6e-10	2.95e-11	0.288933
KIR3DL2	0.277096	1.18e-10	0.276241	4.56e-10
KIR3DL3	0.133567	0.00222791	0.11953	0.00795241
KIR2DS4	0.131627	0.0025848	0.135159	0.00266327
HLA-DPB1	0.23777	4.22e-08	0.236393	1.12e-07
HLA-DQB1	0.222083	2.96e-07	0.207381	3.5e-06
HLA-DRA	0.321996	4.67e-14	0.324165	1.68e-13
HLA-DPA1	0.342321	1.07e-15	0.33954	9.68e-15
BDCA-1(CD1C)	0.253603	4.19e-09	0.241794	5.62e-08
BDCA-4(NRP1)	0.300213	2.47e-12	0.3046	5.06e-12
CD11c(ITGAX)	0.292721	8.99e-12	0.307631	3.03e-12
T-bet(TBX21)	0.300461	2.37e-12	0.299525	1.18e-11
STAT4	0.289808	1.82714e-11	0.284525	1.28994e-10
STAT1	0.349939	1.92228e-16	0.354197	5.47044e-16
IFN-γ(IFNG)	0.275957	1.41067e-10	0.279686	2.71224e-10
TNF-α(TNF)	0.146939	0.000767757	0.155754	0.000525959
GATA3	0.189921	1.25041e-05	0.181722	5.02753e-05
STAT6	0.459829	0	0.460838	3.08068e-27
STAT5A	0.320146	6.62431e-14	0.315079	8.42706e-13
IL13	0.199417	4.40235e-06	0.192409	1.72968e-05
BCL6	0.363368	3.00692e-18	0.368598	2.79985e-17
IL21	0.352467	1.02795e-16	0.33495	2.30733e-14
STAT3	0.572848	0	0.564099	1.11732e-42
IL17A	0.277322	1.13501e-10	0.268039	1.53006e-09
FOXP3	0.42237	0	0.430749	1.20513e-23
CCR8	0.519096	2.36379e-37	0.520762	1.50555e-35
STAT5B	0.408066	2.30103e-22	0.407109	4.58907e-21
TGFβ(TGFB1)	-0.051058	0.244132	-0.0302762	0.502855
PD-1(PDCD1)	0.306992	7.44467e-13	0.311409	1.59147e-12
CTLA4	0.282706	5.79999e-11	0.28665	9.2654e-11
LAG3	0.214009	8.01099e-07	0.208895	2.96277e-06
TIM-3(HAVCR2)	0.271299	3.46916e-10	0.272446	8.02715e-10
GZMB	0.221131	3.57971e-07	0.223239	5.66387e-07
