# Supplementary figures and images for: The m6A reader protein YTHDC2 is a potential biomarker and associated with immune infiltration in head and neck squamous cell carcinoma
Source: PeerJ journal article supplement (doi:10.7717/peerj.10385), 2020-11-26

YTHDC2 Expression Level (log2 RSEM)

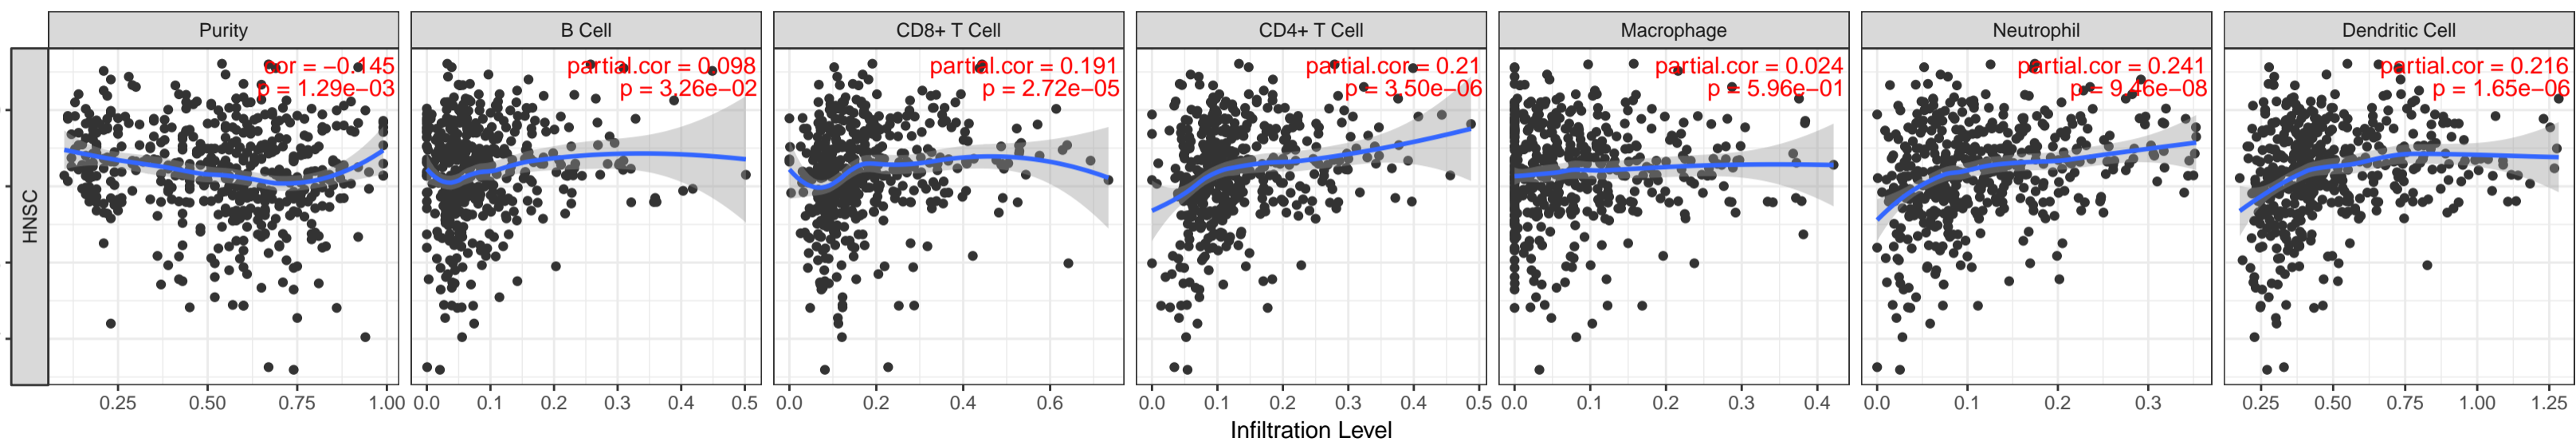

Supplement: Raw_data_3.zip [file Raw_data_3.zip]

# YTHDC2

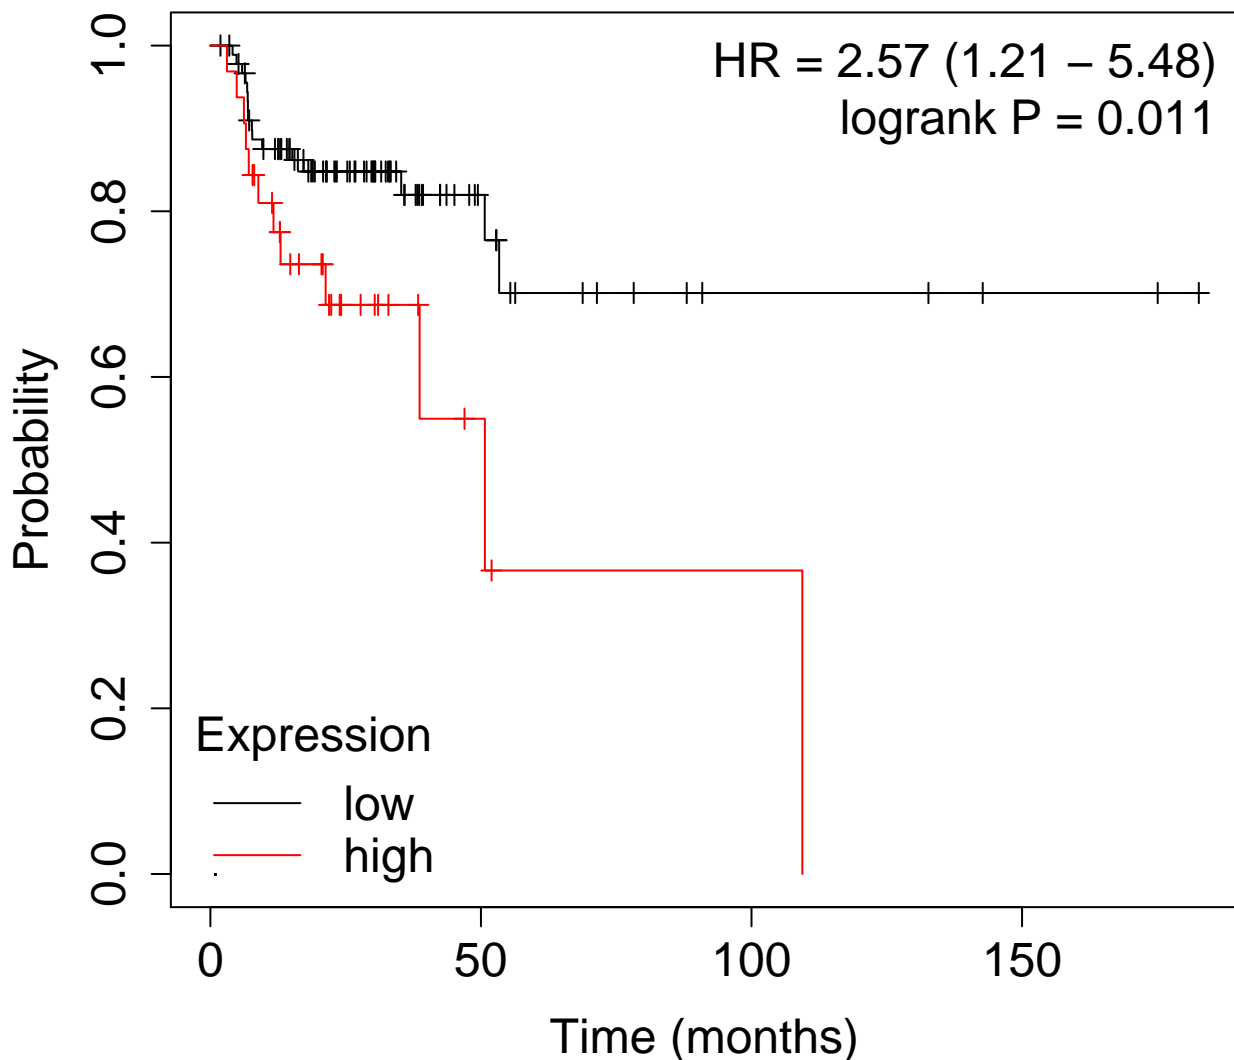

Number at risk

low  
high

92  
32

15  
3

4  
1

2  
0

Supplement: Raw_data_3.zip [file Raw_data_3.zip]

# YTHDC2

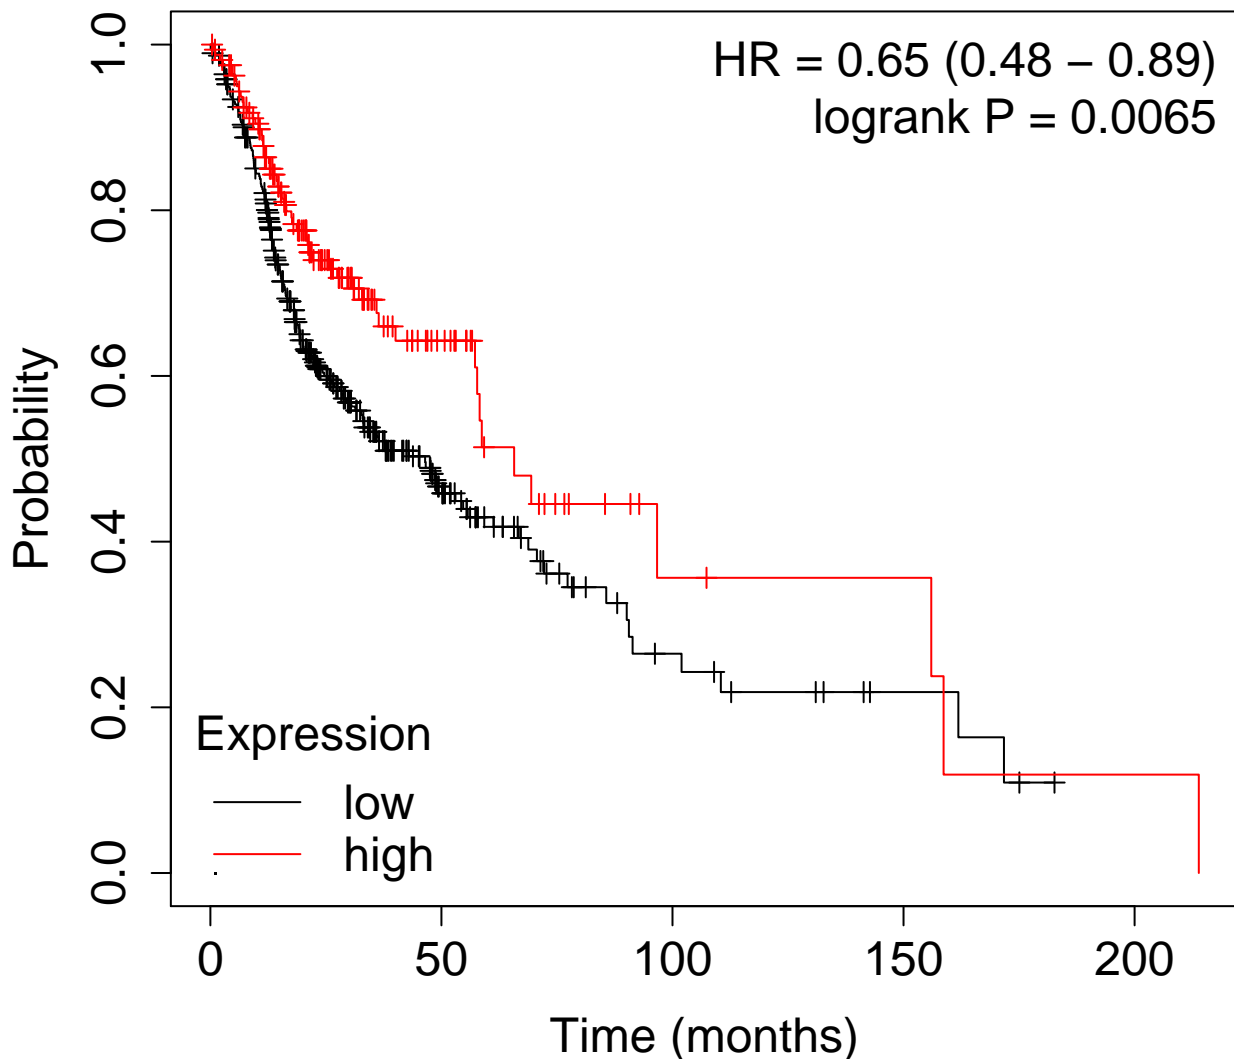

Number at risk

low  
high

336  
163

57  
29

12  
4

4  
3

0  
1

Supplement: Raw_data_3.zip [file Raw_data_3.zip]
